# Supplementary material for: Concentrations of Water-Soluble Forms of Choline in Human Milk from Lactating Women in Canada and Cambodia
Source: Nutrients. 2018 Mar 20;10(3):381. doi: 10.3390/nu10030381 (PMC5872799; doi:10.3390/nu10030381)
Supplement: Supplementary file 1 [file nutrients-10-00381-s001.pdf]

**Supplementary Table S1.** Comparison of the concentrations of water-soluble forms of choline in milk samples in the Canadian trials <sup>1</sup>.

| Comparison                     | <i>n</i> | Free choline | Phospho-choline | Glycerophospho-choline | Water-soluble choline <sup>5</sup> |
|--------------------------------|----------|--------------|-----------------|------------------------|------------------------------------|
| Canadian trial 1, by treatment |          |              |                 |                        |                                    |
| Placebo                        | 79       | 153 ± 85     | 514 ± 193       | 394 ± 121              | 1061 ± 204                         |
| DHA, 400 mg/d                  | 68       | 139 ± 57     | 525 ± 155       | 388 ± 131              | 1052 ± 211                         |
| <i>P</i> value <sup>2</sup>    |          | 0.533        | 0.702           | 0.652                  | 0.772                              |
| Canadian trial 2, by treatment |          |              |                 |                        |                                    |
| Vitamin D, 10 µg/d             | 54       | 143 ± 93     | 554 ± 241       | 439 ± 159              | 1136 ± 349                         |
| Vitamin D, 25 µg/d             | 48       | 152 ± 104    | 546 ± 216       | 415 ± 160              | 1122 ± 324                         |
| Vitamin D, 50 µg/d             | 52       | 164 ± 90     | 571 ± 238       | 425 ± 211              | 1158 ± 391                         |
| <i>P</i> value <sup>3</sup>    |          | 0.086        | 0.626           | 0.673                  | 0.634                              |
| By Canadian trial              |          |              |                 |                        |                                    |
| Canadian trial 1               | 147      | 147 ± 73     | 519 ± 176       | 391 ± 125              | 1057 ± 207                         |
| Canadian trial 2               | 154      | 153 ± 103    | 551 ± 232       | 426 ± 178              | 1136 ± 369                         |
| <i>P</i> value <sup>4</sup>    |          | 0.604        | 0.169           | 0.078                  | 0.140                              |

<sup>1</sup> Data presented as mean ± SD (µmol/L), concentrations were quantified using liquid chromatography-tandem mass spectrometry; <sup>2</sup> Trial 1 compared docosahexaenoic acid (DHA) versus placebo and difference by treatment was assessed by independent samples Student's *t* test; <sup>3</sup> Trial 2 compared doses of vitamin D and difference by treatment was assessed by one-way ANOVA; <sup>4</sup> Trial 1 used hindmilk and trial 2 used a full breast expression, difference by trial was assessed by independent samples Student's *t* test; <sup>5</sup> Water-soluble choline corresponds to the sum of free choline, phosphocholine, and glycerophosphocholine.

**Supplementary Table S2.** Comparison of the concentrations of water-soluble forms of choline in milk samples in the Cambodian trial.

| Comparison                       | <i>n</i> | Free choline | Phospho-choline | Glycerophospho-choline | Water-soluble choline <sup>4</sup> |
|----------------------------------|----------|--------------|-----------------|------------------------|------------------------------------|
| By treatment <sup>1</sup>        |          |              |                 |                        |                                    |
| Placebo                          | 22       | 135 ± 68     | 541 ± 194       | 393 ± 126              | 1069 ± 253                         |
| Thiamine, 2 g/L                  | 26       | 150 ± 109    | 560 ± 186       | 387 ± 153              | 1098 ± 287                         |
| Thiamine, 8 g/L                  | 19       | 146 ± 75     | 579 ± 244       | 389 ± 134              | 1115 ± 274                         |
| <i>P</i> value <sup>2</sup>      |          | 0.110        | 0.751           | 0.990                  | 0.536                              |
| By weeks postpartum <sup>3</sup> |          |              |                 |                        |                                    |
| <i>r</i>                         | 67       | 0.094        | -0.173          | 0.202                  | 0.011                              |
| <i>P</i> value                   |          | 0.447        | 0.161           | 0.101                  | 0.930                              |

<sup>1</sup> Data presented as mean ± SD (µmol/L), concentrations were quantified using liquid chromatography-tandem mass spectrometry; <sup>2</sup> The Cambodian trial compared doses of thiamine versus placebo and difference by treatment was assessed by one-way ANOVA; <sup>3</sup> Milk samples were collected between 3 – 28 weeks postpartum and the association with the concentrations of water-soluble forms of choline was determined using Pearson's correlation; <sup>4</sup> Water-soluble choline corresponds to the sum of free choline, phosphocholine, and glycerophosphocholine.

**Supplementary Table S3.** Estimated dietary choline intake during pregnancy from a subset of Canadian participants.

| <b>Dietary intakes <sup>1</sup></b><br>( <i>n</i> = 143) | <b>16 weeks of<br/>gestation</b> | <b>36 weeks of<br/>gestation</b> | <b>Difference <sup>5</sup></b><br><i>P</i> value | <b>Correlation <sup>6</sup></b> |                |
|----------------------------------------------------------|----------------------------------|----------------------------------|--------------------------------------------------|---------------------------------|----------------|
|                                                          |                                  |                                  |                                                  | <i>r</i>                        | <i>P</i> value |
| Free choline                                             | 92.2 ± 25.5                      | 86.7 ± 23.5                      | 0.175                                            | 0.544                           | < 0.001        |
| Phosphocholine                                           | 24.5 ± 9.6                       | 22.6 ± 10.7                      | 0.156                                            | 0.479                           | < 0.001        |
| Glycerophosphocholine                                    | 87.5 ± 35.3                      | 92.3 ± 35.3                      | 0.106                                            | 0.493                           | < 0.001        |
| Water-soluble choline <sup>2</sup>                       | 204.2 ± 61.5                     | 202.6 ± 58.0                     | 0.787                                            | 0.559                           | < 0.001        |
| Phosphatidylcholine                                      | 185.2 ± 60.6                     | 185.5 ± 66.0                     | 0.958                                            | 0.505                           | < 0.001        |
| Sphingomyelin                                            | 19.7 ± 6.3                       | 20.4 ± 6.5                       | 0.145                                            | 0.573                           | < 0.001        |
| Lipid-soluble choline <sup>3</sup>                       | 205.0 ± 65.3                     | 205.9 ± 71.1                     | 0.873                                            | 0.519                           | < 0.001        |
| Total choline <sup>4</sup>                               | 409.2 ± 102.2                    | 408.5 ± 111.0                    | 0.927                                            | 0.590                           | < 0.001        |

<sup>1</sup> Data presented as mean ± SD (mg/d), dietary choline intakes were estimated at 36 weeks of gestation using a food frequency questionnaire and the USDA database on choline content in common foods (version 2); <sup>2</sup>

Water-soluble choline corresponds to the sum of free choline, phosphocholine, and glycerophosphocholine; <sup>3</sup>

Lipid-soluble choline corresponds to the sum of phosphatidylcholine and sphingomyelin; <sup>4</sup> Total choline corresponds to the sum of all individual forms of choline; <sup>5</sup> Dependent samples Student's *t* test; <sup>6</sup> Pearson's correlation coefficients.
